# Supplementary material for: Design of Therapeutic Education Workshops for Home Heamodialysis in a Patient-Centered CKD Research: A Qualitative Study
Source: Research Square preprint supplement (doi:10.21203/rs.3.rs-509941/v1), 2021-06-30
Supplement: Supplementary file 1 [file baf9cd891cf297ce9d35823d.docx]

Appendix 1 : **Interview guide**

Hello/good morning

1. I am visiting you on behalf of your nephrologist so as to get your feedback about home dialysis. Do you agree to share it with us?
2. Thank you for your time. I would like to know how long you have been on dialysis and how your dialysis is going right now.
3. I would like you to take a few minutes to go back in time, so as to recall the time before you started home dialysis, ok?
4. Could you tell me about the factors that triggered your decision to dialyze at home?
5. What were the obstacles and the difficulties that you thought at that time would hinder the HDD?
6. Now that you have been home dialyzing for............what are the elements that made you favor being on home dialysis rather than in the dialysis center?
7. Do you feel any kind of discomfort or negative reluctances about your current experience?
8. If you had to talk about HHD to another patient, what would you say to them?
